# Supplementary material for: Global gene expression of the inner cell mass and trophectoderm of the bovine blastocyst
Source: PubMed Central journal article supplement (PMC3514149; doi:10.1186/1471-213x-12-33), 2012-11-06
Supplement: 1471-213X-12-33-S1.pdf [file 1471-213X-12-33-S1.pdf]

**Formula 1: Position-specific weight matrix (PSWM) scores**

$$score = \sum_{i=1}^l \log\left(\frac{(n_{if} + 1)}{(N_i + 4)} * (1/4)\right)$$

where  $l$ : length of the matrix;  $n_{if}$ : the observed number of base ' $f$ ' (A, C, G or T) at the  $i$ -th position in the training;  $N_i$ : sum of the observed number of all bases at  $i$ -th position.

**Formula 2: Ratio of the score to the maximum score**

$$ratio = \frac{score - \min(score)}{\max(score) - \min(score)}$$

where  $\min(score)$ : minimum value of each PSWM,  $\max(score)$ : maximum value of each PSWM.

**Formula 3: Hypergeometric distribution**

$$\sum_{x=i}^{Np} \frac{\binom{Np}{x} \cdot \binom{N(1-p)}{n-x}}{\binom{N}{x}}$$

where  $N$ : total number of promoters,  $p$ : expected frequency of the promoters associated with a given PSWM (number of associated promoters/ $N$ ),  $n$ : total number of promoters belonging to a dataset of concern, and  $i$ : number of the promoters associated with a given PSWM in a dataset.
