# Supplementary material for: Global gene expression of the inner cell mass and trophectoderm of the bovine blastocyst
Source: PubMed Central journal article supplement (PMC3514149; doi:10.1186/1471-213x-12-33), 2012-11-06
Supplement: 1471-213X-12-33-S3.pdf [file 1471-213X-12-33-S3.pdf]

Glycan Biosynthesis and Metabolism

Nucleotide Metabolism

Metabolism of Cofactors and Vitamins

Biosynthesis of Other Secondary Metabolites

Lipid Metabolism

Carbohydrate Metabolism

Amino Acid Metabolism

Energy Metabolism

Metabolism of Other Amino Acid

Metabolism of Terpenoids and Polyketides

Xenobiotics Biodegradation and Metabolism

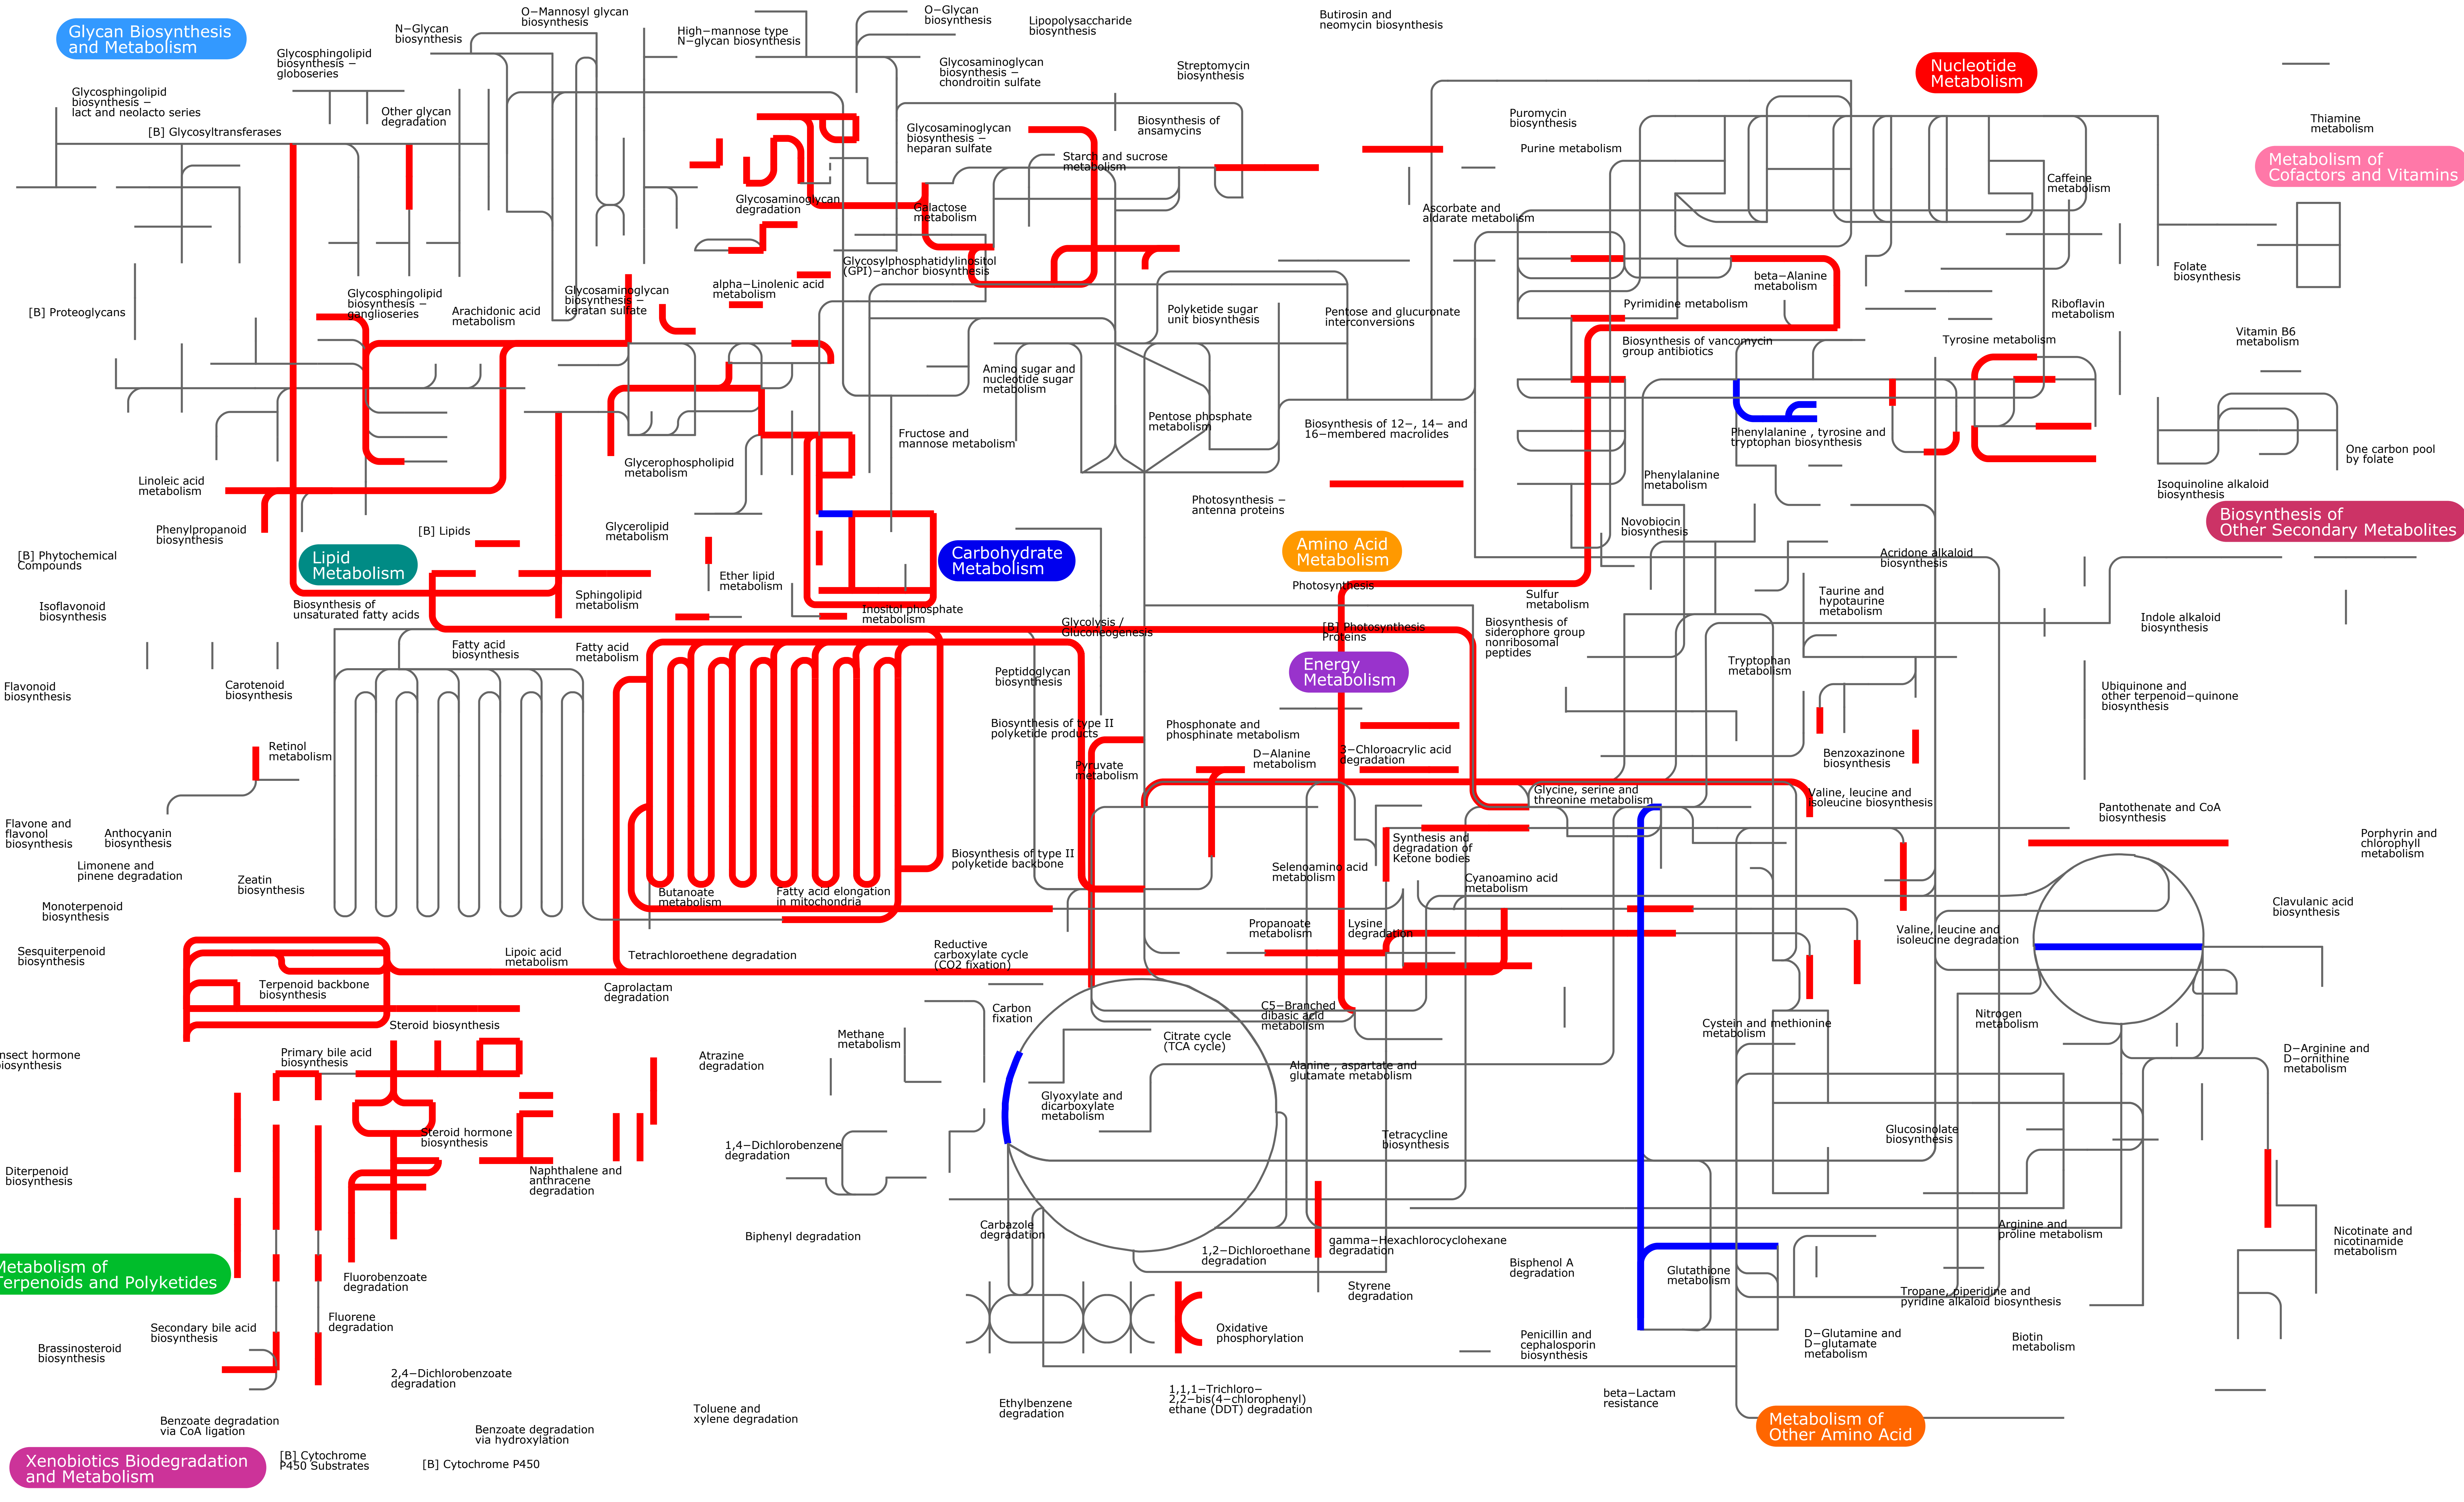

[B] Cytochrome P450 Substrates

[B] Cytochrome P450
