# Supplementary material for: Global gene expression of the inner cell mass and trophectoderm of the bovine blastocyst
Source: PubMed Central journal article supplement (PMC3514149; doi:10.1186/1471-213x-12-33), 2012-11-06
Supplement: 1471-213X-12-33-S5.pdf [file 1471-213X-12-33-S5.pdf]

Additional File 4. Differences in expression between inner cell mass (ICM) and trophoctoderm (TE) for genes considered as being characteristically expressed by ICM, embryonic stem cells and TE in human or mouse. <sup>a</sup>

Genes Considered Characteristic of ICM or embryonic stem cells

|                         |               |                         |                 |                |                |                 |              |                 |                 |               |               |                |
|-------------------------|---------------|-------------------------|-----------------|----------------|----------------|-----------------|--------------|-----------------|-----------------|---------------|---------------|----------------|
| <i>ABL2</i>             | <i>ACOT9</i>  | <i>AMD1</i>             | <i>ARHGER18</i> | <i>BXL2L14</i> | <i>CANX</i>    | <i>CCNB1</i>    | <i>CDCA2</i> | <i>CENPF</i>    | <i>CLDN7</i>    | <i>CYP2S1</i> | <b>DAB2</b>   | <i>DDX3X</i>   |
| <i>DNMT3L</i>           | <b>DSP</b>    | <i>EI24</i>             | <i>EIF1AX</i>   | <i>EIF2S1</i>  | <i>EIF5B</i>   | <i>EPRS</i>     | <i>FGFR2</i> | <i>FGFR3</i>    | <i>FLG</i>      | <i>FOXD3</i>  | <i>FOXH1</i>  | <i>GATA2</i>   |
| <b>GATA3</b>            | <i>GATAD1</i> | <i>GJC1</i>             | <i>GLTSCR2</i>  | <b>GM2A</b>    | <i>GPD1L</i>   | <i>H19</i>      | <i>HMGB1</i> | <i>HN1</i>      | <i>HSD17B11</i> | <i>IFITM2</i> | <i>IGF2R</i>  | <i>IL17RA</i>  |
| <b>IL6R<sup>b</sup></b> | <i>ITGA5</i>  | <i>ITGA6</i>            | <i>JAK2</i>     | <i>JUNB</i>    | <b>KDM2B</b>   | <i>KLF2</i>     | <i>KTN1</i>  | <i>LAMC1</i>    | <i>LAMP2</i>    | <i>LEFTY1</i> | <i>LRPAP1</i> | <i>MAP3K3</i>  |
| <i>MORC1</i>            | <i>MRPL15</i> | <i>MTCH2</i>            | <i>MUC15</i>    | <i>MYC</i>     | <b>NANOG</b>   | <i>NANOS1</i>   | <i>NODAL</i> | <b>OTX2</b>     | <i>PAX8</i>     | <i>PDPN</i>   | <i>PEG3</i>   | <i>PEX3</i>    |
| <i>PLK1</i>             | <i>POU2F1</i> | <i>POU5F1</i>           | <i>PPARD</i>    | <i>PTP4A1</i>  | <i>PTTG1IP</i> | <i>PUM1</i>     | <i>PUM2</i>  | <i>PYGB</i>     | <i>RAB12</i>    | <i>PYGB</i>   | <i>RAB12</i>  | <i>RAB5C</i>   |
| <i>RAB6A</i>            | <i>RELL1</i>  | <i>RHPN2</i>            | <i>RPL14</i>    | <i>RPL19</i>   | <i>RPL32</i>   | <i>RPL7A</i>    | <i>RUNX1</i> | <i>SALL4</i>    | <i>SBNO1</i>    | <b>SCD</b>    | <i>SIN3B</i>  | <i>SLIT3</i>   |
| <i>SMAD2</i>            | <i>SMAD4</i>  | <i>SMAD5</i>            | <i>SNX3</i>     | <b>SOX2</b>    | <i>SPATA13</i> | <i>SPETA5L1</i> | <b>SPIC</b>  | <i>SRRM1</i>    | <b>SSFA2</b>    | <i>STAG2</i>  | <b>STAT3</b>  | <i>TACC1</i>   |
| <i>TAL1</i>             | <i>TAXBP1</i> | <b>TFRC<sup>c</sup></b> | <i>TGFBR1</i>   | <i>TGFBR3</i>  | <i>TMED2</i>   | <i>TOP2A</i>    | <i>TPRKB</i> | <i>TRNAU1AP</i> | <b>VAV3</b>     | <i>XIST</i>   | <i>ZBTB34</i> | <b>ZC3HAV1</b> |
| <i>ZFP42</i>            | <i>ZNF296</i> |                         |                 |                |                |                 |              |                 |                 |               |               |                |

Genes Considered Characteristic of TE

|              |                        |               |               |                |               |              |              |              |              |               |              |             |
|--------------|------------------------|---------------|---------------|----------------|---------------|--------------|--------------|--------------|--------------|---------------|--------------|-------------|
| <b>AQP11</b> | <i>ARNT2</i>           | <i>ASCL2</i>  | <b>ATP1B3</b> | <i>BMP4</i>    | <i>CDH19</i>  | <i>CDH22</i> | <b>CDH24</b> | <i>CDX1</i>  | <i>CDX2</i>  | <i>CELSR2</i> | <i>CGB</i>   | <i>CGB1</i> |
| <i>CGB2</i>  | <b>CGN<sup>d</sup></b> | <i>CLDN10</i> | <i>CLDN2</i>  | <i>CSNK1A1</i> | <b>CYP11A</b> | <i>DAAM1</i> | <b>DSC2</b>  | <b>ELF5</b>  | <i>EOMES</i> | <i>ESRRB</i>  | <i>FGFR2</i> | <i>GCM1</i> |
| <i>HAND1</i> | <i>HLA-G</i>           | <b>HSD3B1</b> | <b>IFNT1</b>  | <i>ID2</i>     | <i>IRX3</i>   | <i>JAM2</i>  | <i>KRT1</i>  | <b>KRT18</b> | <i>LEP</i>   | <i>LHCGR</i>  | <b>MSX2</b>  | <i>OCLN</i> |
| <b>PAG2</b>  | <i>PCDH1</i>           | <i>PCDHB7</i> | <i>PSG3</i>   | <b>SFN</b>     | <i>TBX1</i>   | <i>TEAD2</i> | <i>TEAD4</i> | <b>TKDP1</b> | <b>TJP2</b>  |               |              |             |

<sup>a</sup> Genes in blue were upregulated in ICM and genes in red were upregulated in TE. The adjusted P value was <0.05 unless indicated by superscripts

<sup>b</sup> adjusted P=0.05

<sup>c</sup> adjusted P=0.06.

<sup>d</sup> adjusted P=0.09.
